# Supplementary material
Source: PubMed Central journal article supplement (PMC9677434)

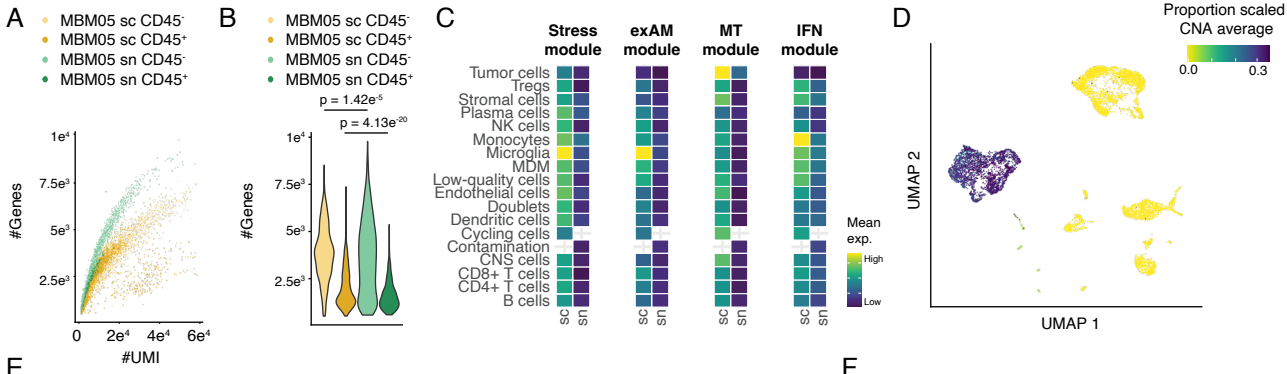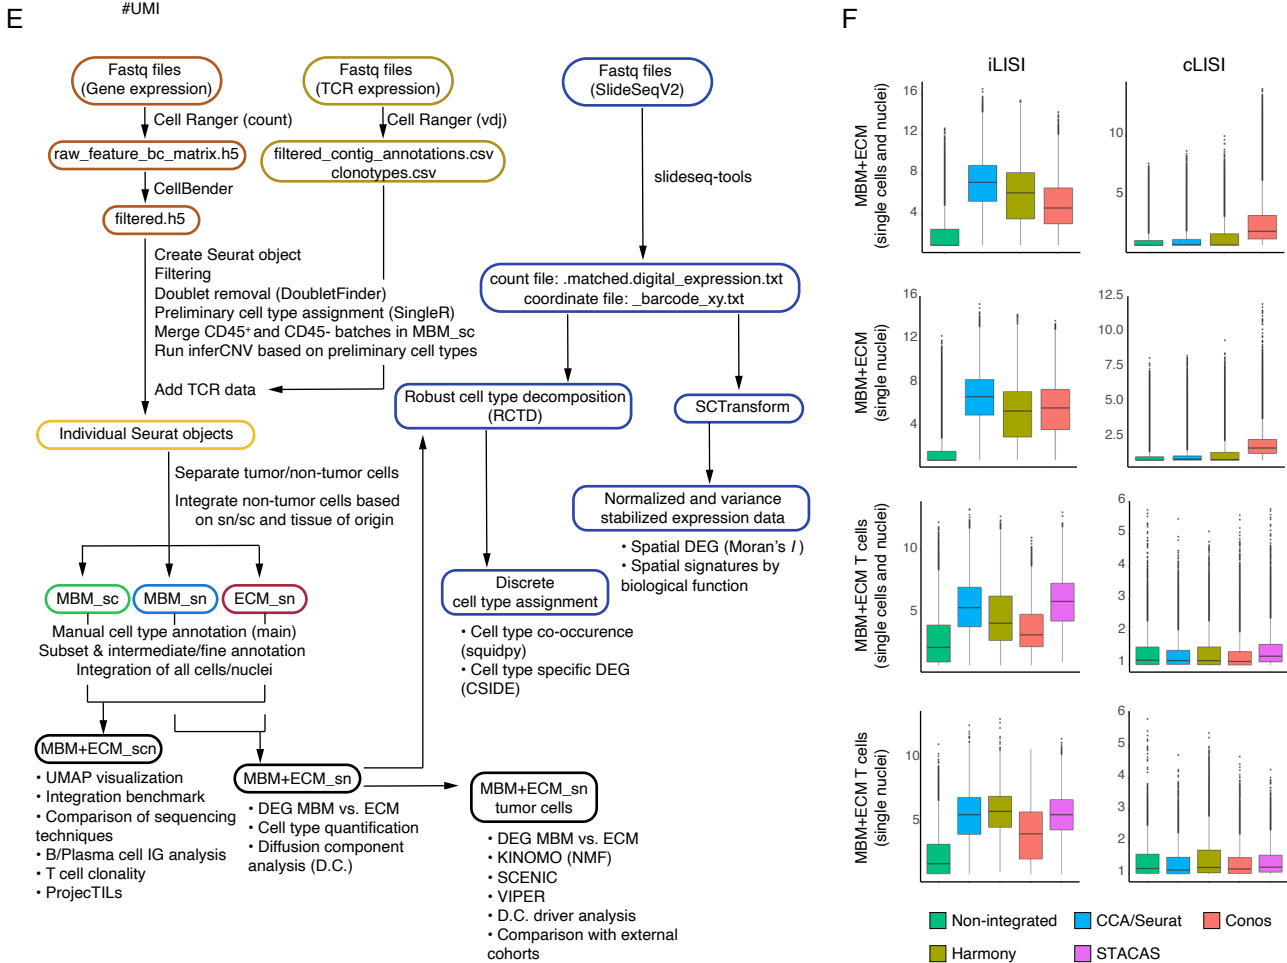

Supplement: NIHMS1819979-supplement-SF1.pdf [file NIHMS1819979-supplement-SF1.pdf]

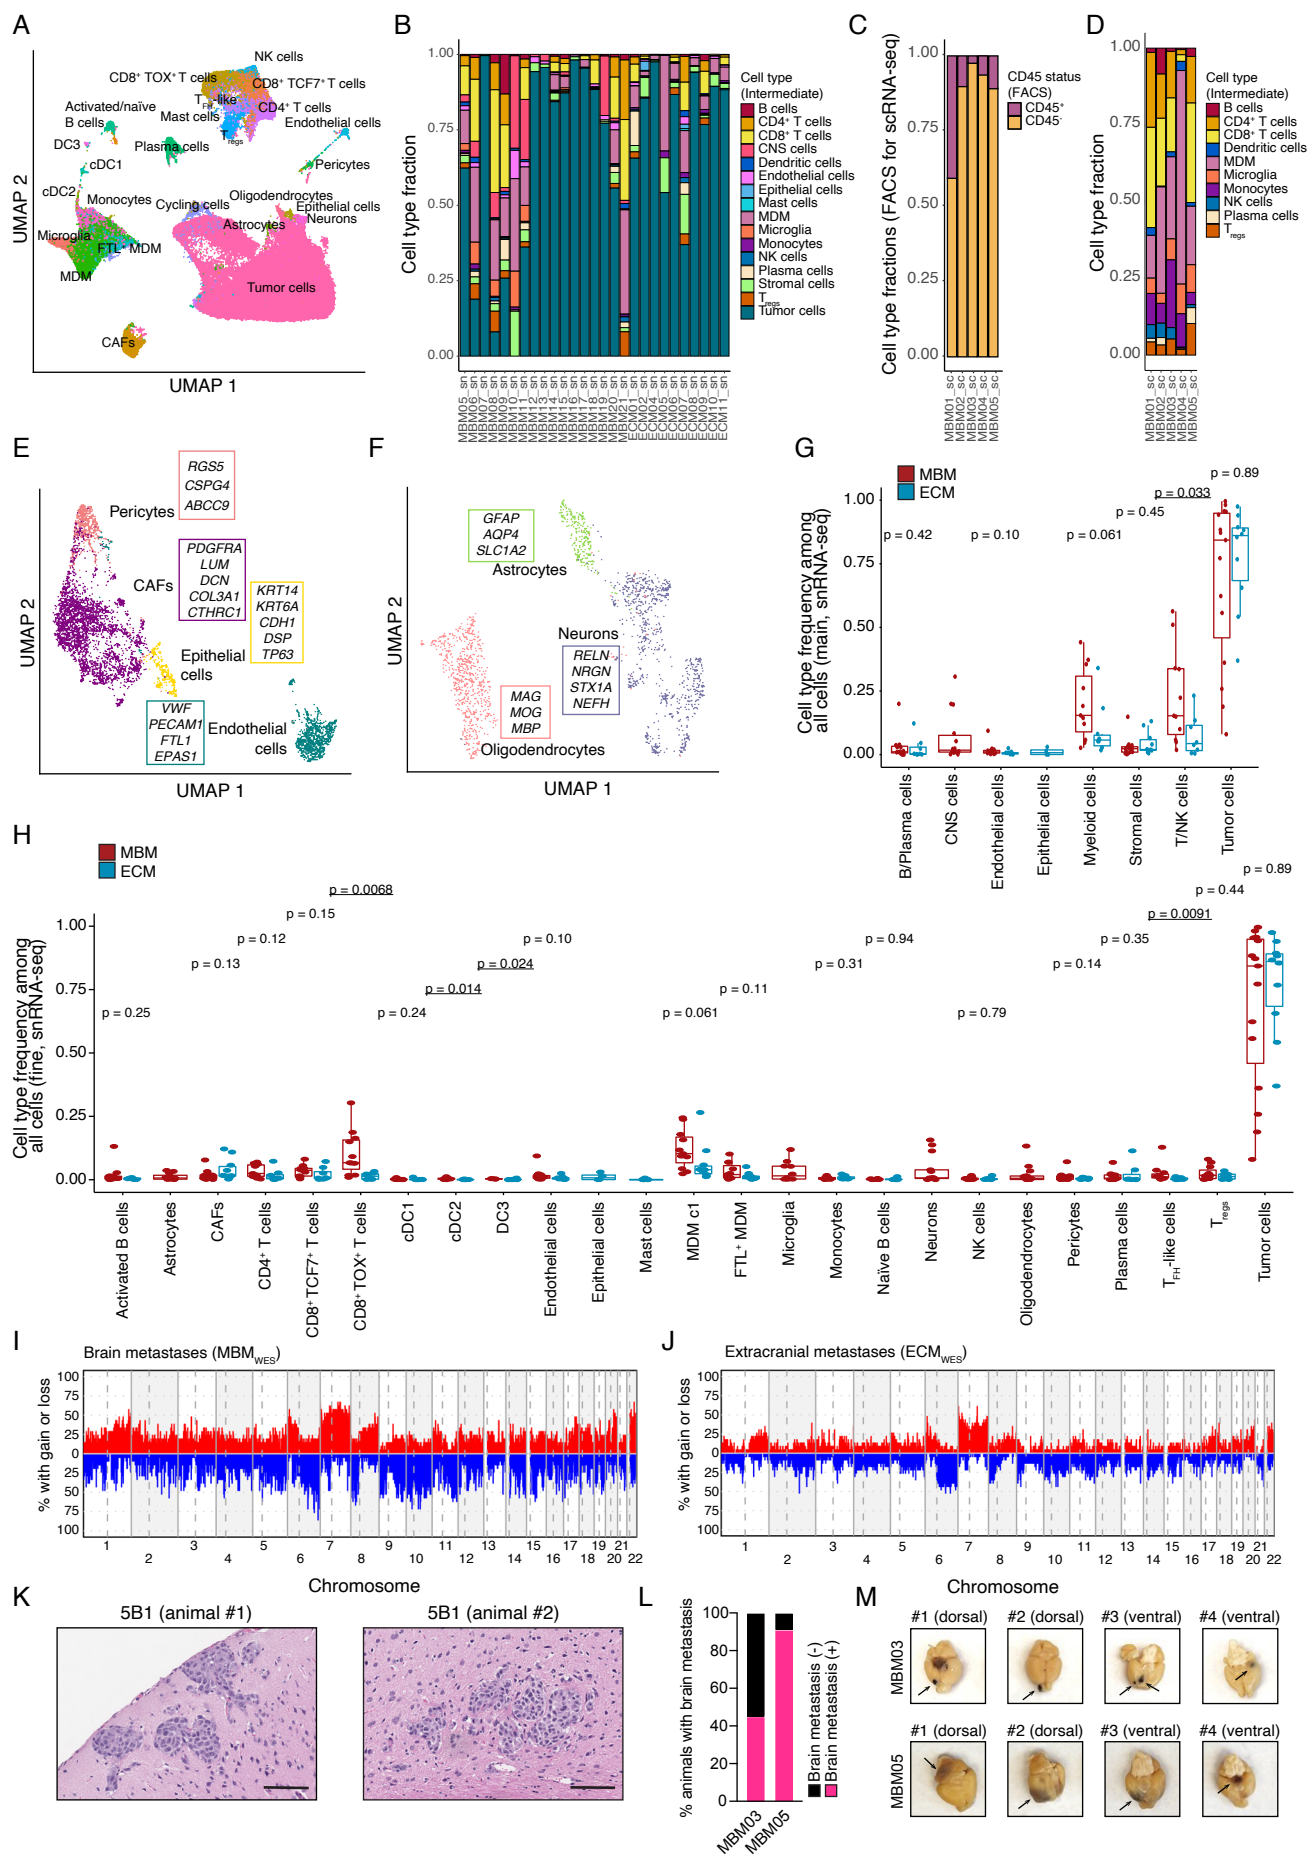

Supplement: NIHMS1819979-supplement-SF2.pdf [file NIHMS1819979-supplement-SF2.pdf]

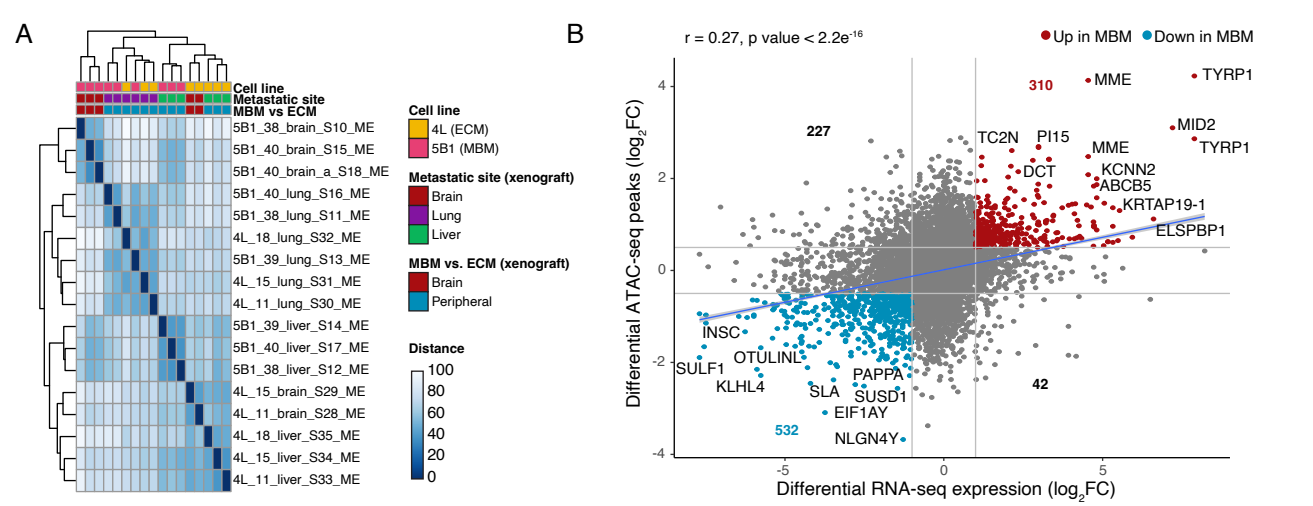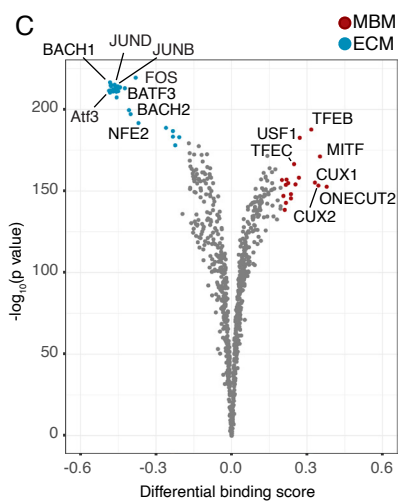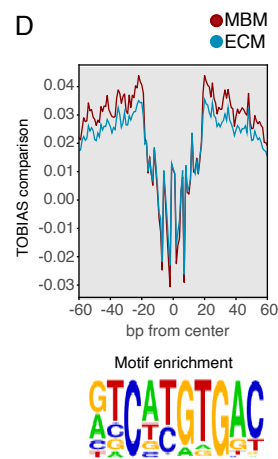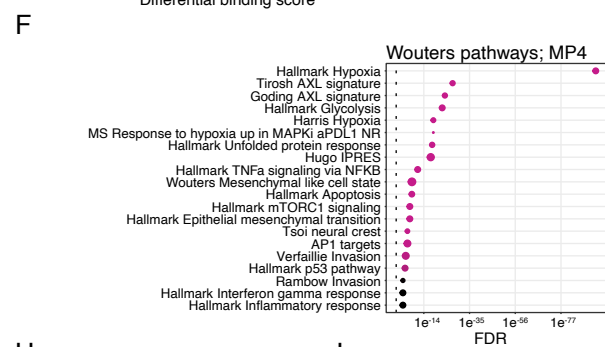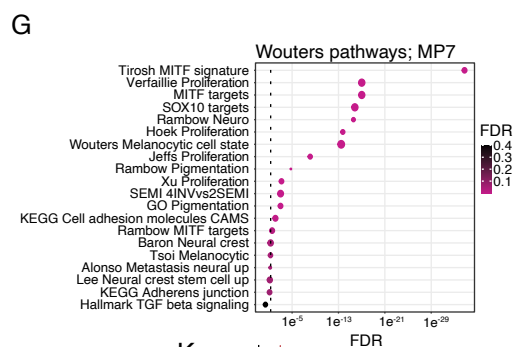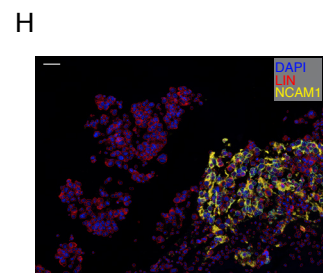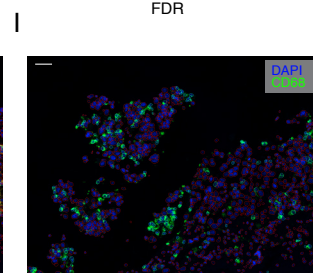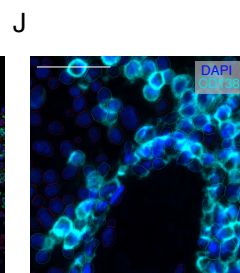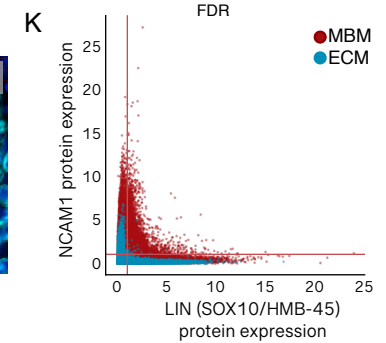

Supplement: NIHMS1819979-supplement-SF4.pdf [file NIHMS1819979-supplement-SF4.pdf]

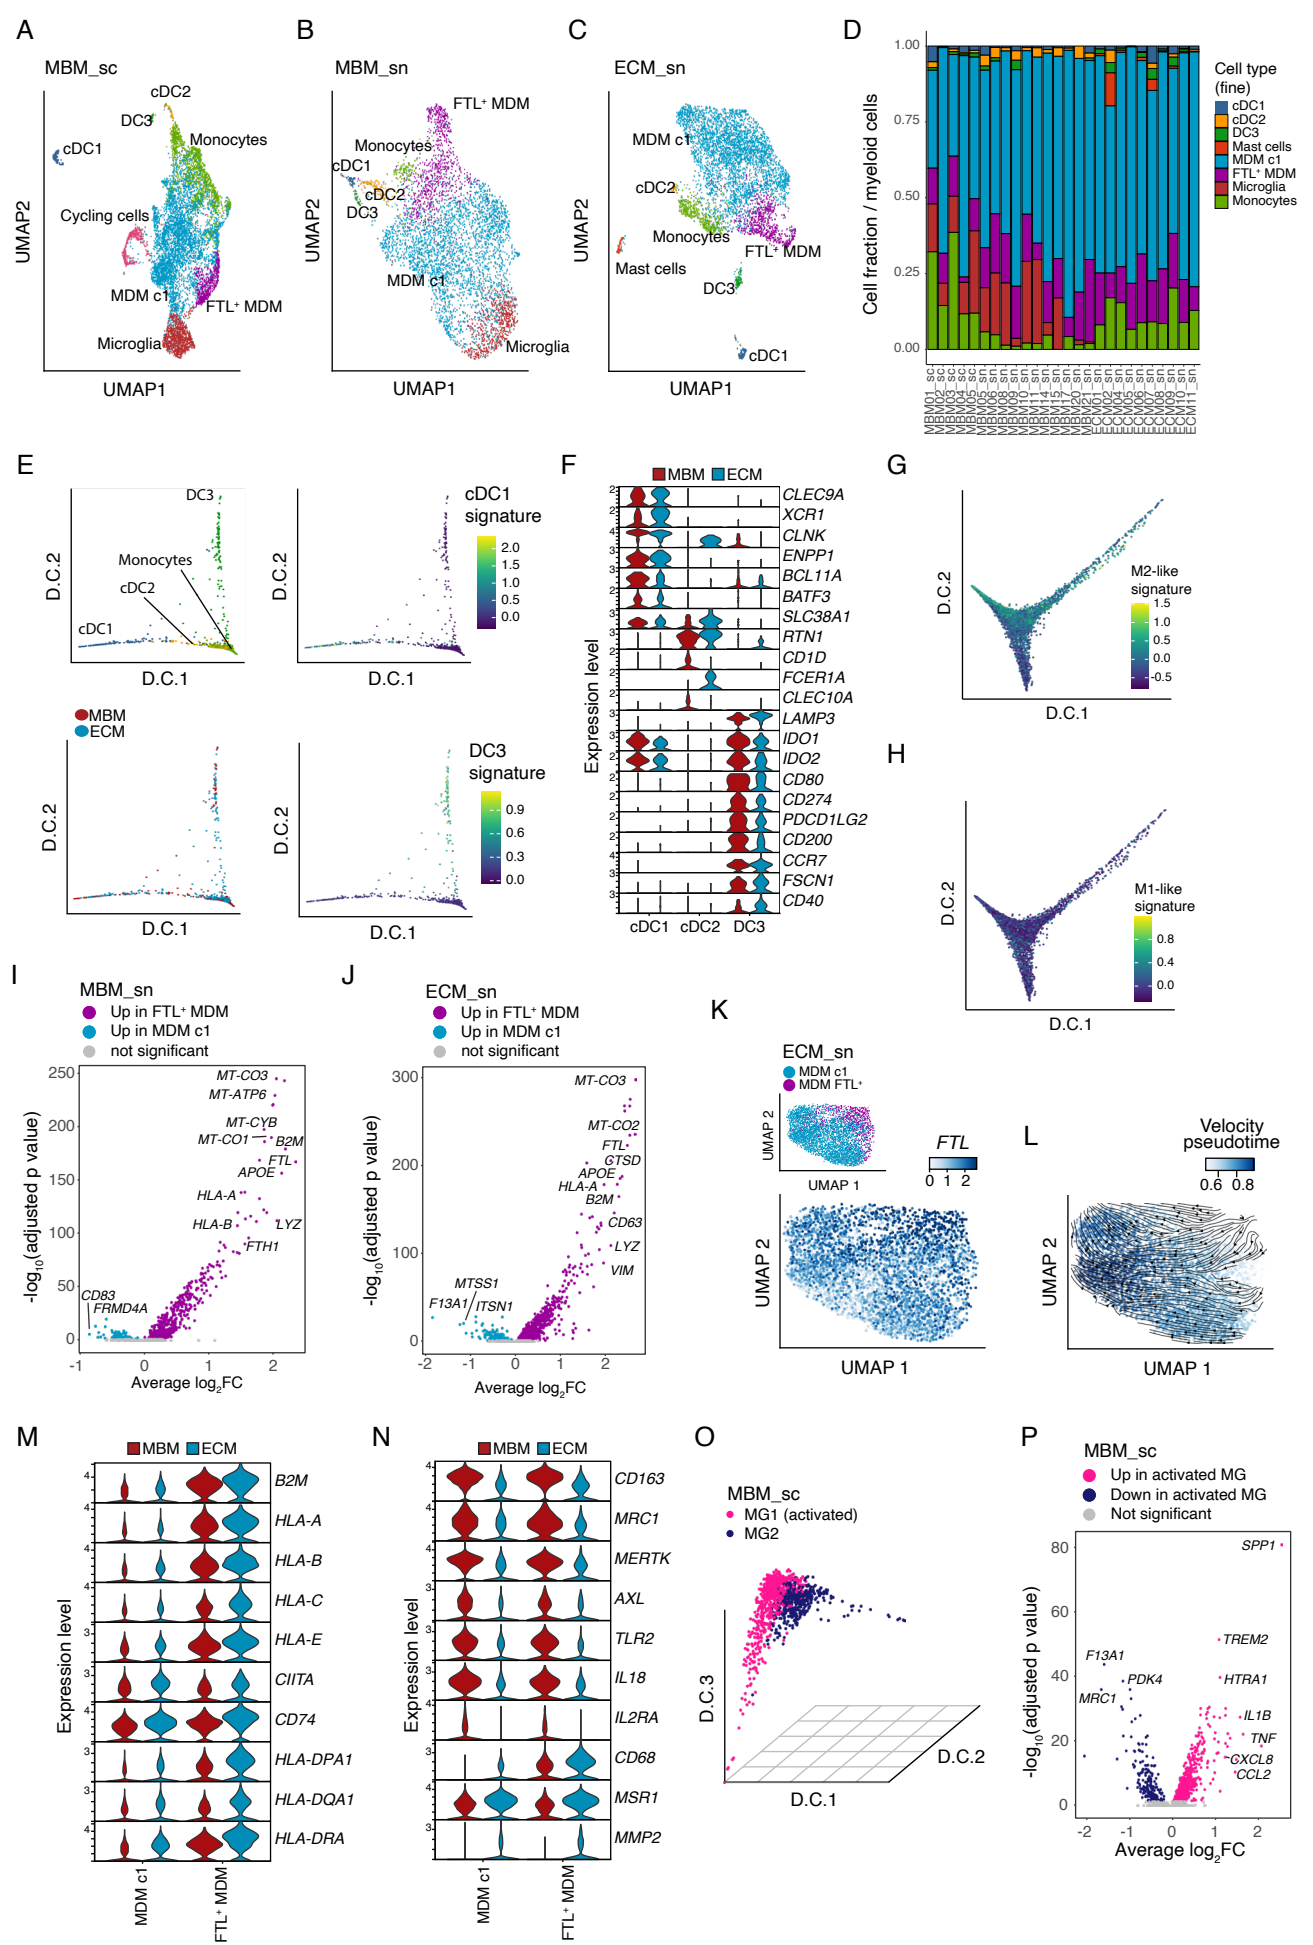

Supplement: NIHMS1819979-supplement-SF5.pdf [file NIHMS1819979-supplement-SF5.pdf]

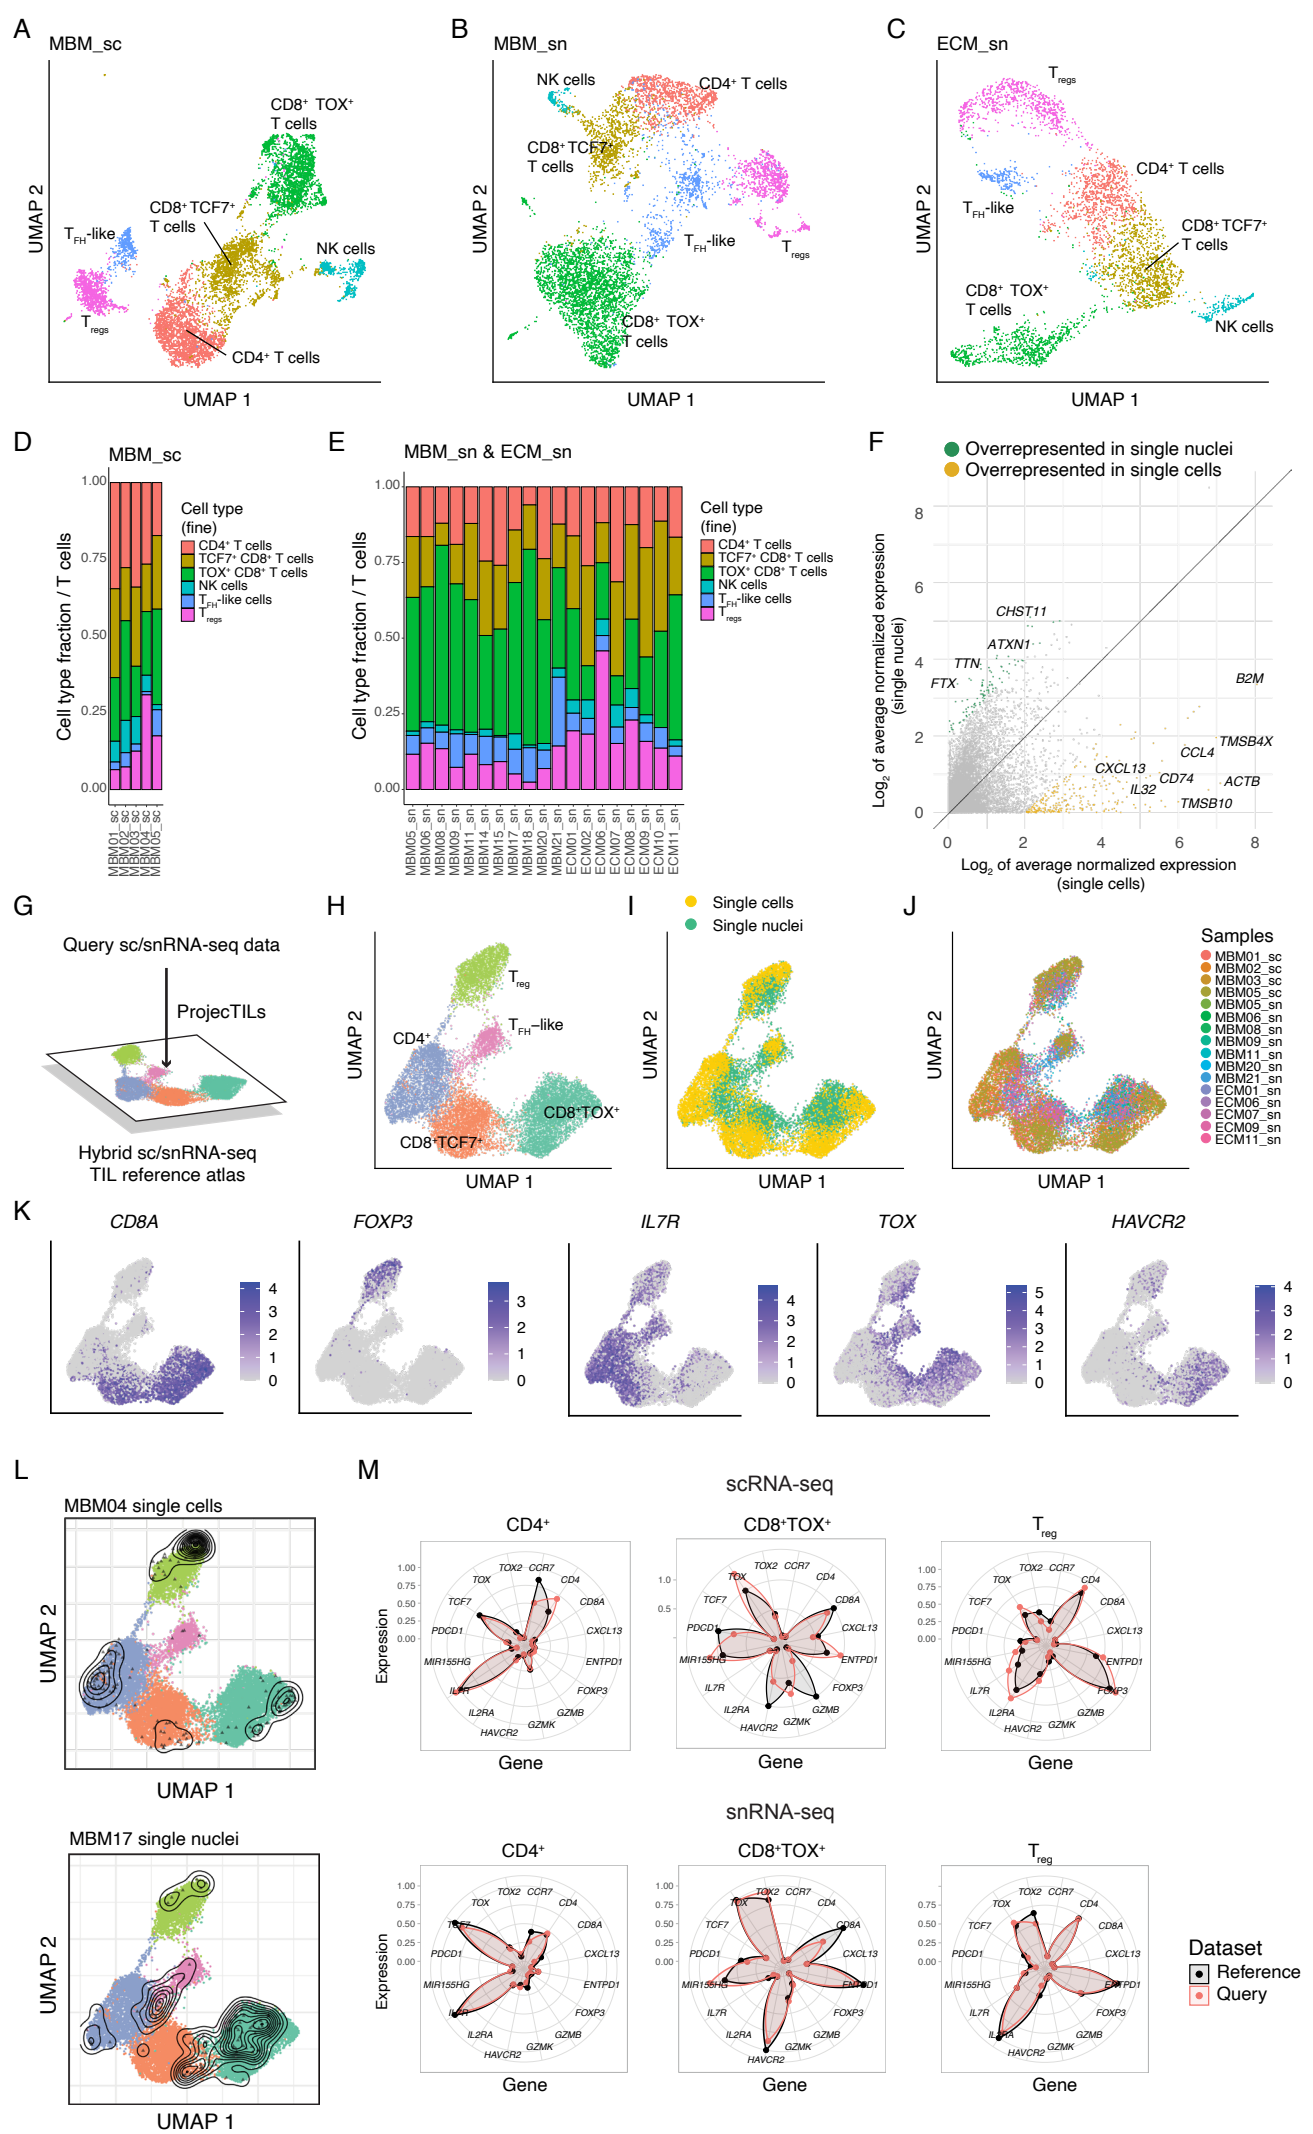

Supplement: NIHMS1819979-supplement-SF6.pdf [file NIHMS1819979-supplement-SF6.pdf]

**A**

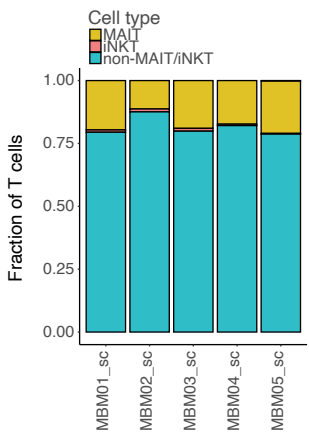

**B**

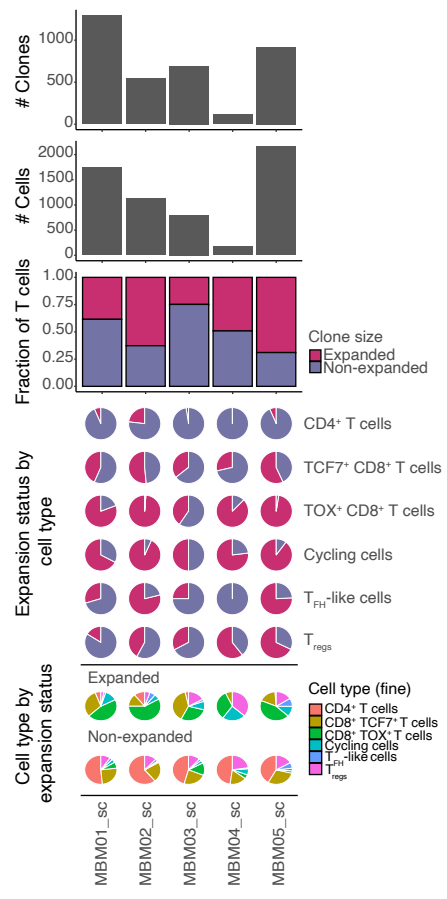

**D**

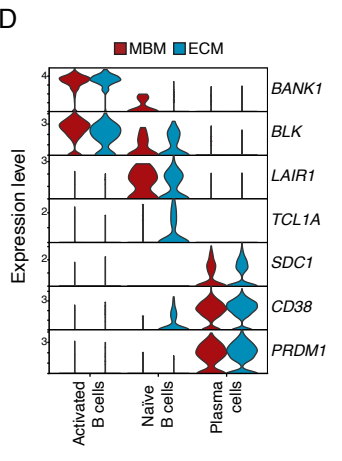

**C**

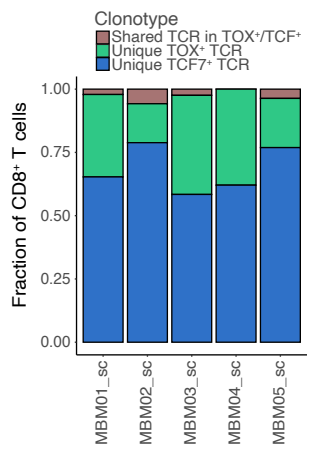

**E**

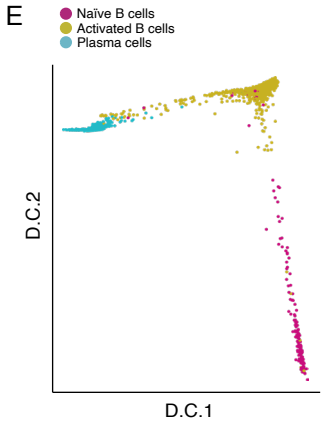

**F**

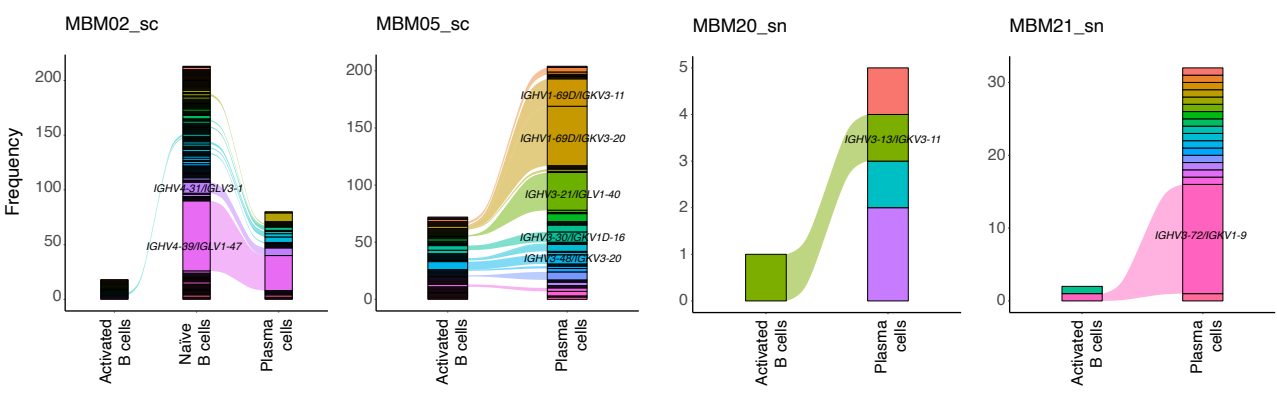

**G**

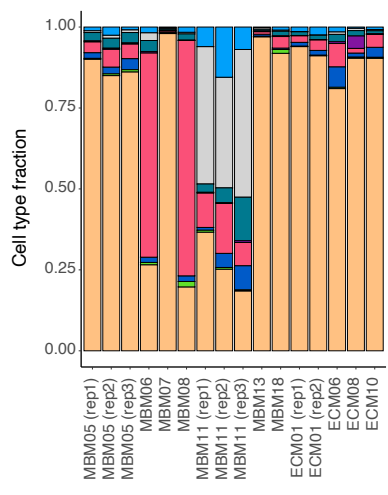

Supplement: NIHMS1819979-supplement-SF7.pdf [file NIHMS1819979-supplement-SF7.pdf]
